# Supplementary material for: Development of a Sport Food Exchange List for Dietetic Practice in Sport Nutrition
Source: PubMed Central journal article supplement (PMC7468869; doi:10.3390/nu12082403), 2020-08-11
Supplement: nutrients-12-02403-s001.pdf [file nutrients-12-02403-s001.pdf]

Table S1. Sports Foods Exchange Lists.

| SPORTS DRINKS GROUP                          | EXCHANGE VALUE    |                      |                | 138            | 0,04    | 33               | 0,01    | 1           | -0,17   | 0,00    | -0,21   |             |  |
|----------------------------------------------|-------------------|----------------------|----------------|----------------|---------|------------------|---------|-------------|---------|---------|---------|-------------|--|
| Product name                                 | Brand name        | Net weight (g or ml) | Serving dosage | Energy (Kcal)  | Z value | Carbohydrate (g) | Z value | Protein (g) | Z value | Fat (g) | Z value | Sodium (mg) |  |
|                                              |                   |                      |                | <250 mg sodium |         |                  |         |             |         |         |         |             |  |
| Nd3                                          | Infisport         | 30                   | 2 serving      | 115,00         | -1,15   | 27,50            | -1,47   | 1,25        | 0,13    | 0,00    | 0,00    | 0,00        |  |
| Amylopectin                                  | Infisport         | 40                   | 3 serving      | 144,00         | 0,30    | 36,00            | 0,80    | 0,00        | -0,52   | 0,00    | 0,00    | 0,00        |  |
| Bebida isotónica – limón                     | Enervit           | 30                   | 2 serving      | 109,80         | -1,41   | 27,50            | -1,48   | 0,00        | -0,52   | 0,00    | 0,00    | 144,00      |  |
| Nutrixxion energía bebida endurance xx force | Nutrixxion        | 35                   | 2 serving      | 123,64         | -0,72   | 30,20            | -0,75   | 0,71        | -0,15   | 0,00    | 0,00    | 245,20      |  |
| Nutrixxion energía bebida endurance orange   | Nutrixxion        | 35                   | 2 serving      | 129,41         | -0,43   | 32,10            | -0,23   | 0,21        | -0,41   | 0,00    | 0,00    | 245,20      |  |
| Nutrixxion energía bebida endurance lemon    | Nutrixxion        | 35                   | 2 serving      | 129,41         | -0,43   | 32,10            | -0,23   | 0,21        | -0,41   | 0,00    | 0,00    | 245,20      |  |
| Nutrixxion energía bebida endurance redfruit | Nutrixxion        | 35                   | 2 serving      | 129,11         | -0,45   | 32,10            | -0,25   | 0,22        | -0,41   | 0,00    | 0,00    | 245,20      |  |
| Iso drink refresher 700g citrus              | Nutrixxion        | 35                   | 2 serving      | 128,88         | -0,46   | 32,20            | -0,21   | 0,00        | -0,52   | 0,00    | 0,00    | 245,20      |  |
| Nutrixxion iso bebida refresher grapefruit   | Nutrixxion        | 35                   | 2 serving      | 126,56         | -0,57   | 31,60            | -0,36   | 0,00        | -0,52   | 0,00    | 0,00    | 244,00      |  |
| Isotonic drink - sabor limon                 | 226ers            | 40                   | 3 serving      | 136,00         | -0,10   | 34,00            | 0,27    | 0,00        | -0,52   | 0,00    | 0,00    | 196,00      |  |
| Isotonic drink - sabor frutos rojos          | 226ers            | 40                   | 3 serving      | 136,00         | -0,10   | 34,00            | 0,27    | 0,00        | -0,52   | 0,00    | 0,00    | 196,00      |  |
| Isotonic drink - sabor mango                 | 226ers            | 40                   | 3 serving      | 136,00         | -0,10   | 34,00            | 0,27    | 0,00        | -0,52   | 0,00    | 0,00    | 196,00      |  |
| Isotonic drink - sabor cola                  | 226ers            | 40                   | 3 serving      | 136,00         | -0,10   | 34,00            | 0,27    | 0,00        | -0,52   | 0,00    | 0,00    | 196,00      |  |
| Energy drink - lemon                         | 226ers            | 37,5                 | 3 serving      | 132,00         | -0,30   | 33,00            | 0,00    | 0,00        | -0,52   | 0,00    | 0,00    | 24,00       |  |
| Energy drink - mandarina                     | 226ers            | 37,5                 | 3 serving      | 132,00         | -0,30   | 33,00            | 0,00    | 0,00        | -0,52   | 0,00    | 0,00    | 24,00       |  |
| Energy drink - furtos rojos                  | 226ers            | 37,5                 | 3 serving      | 135,00         | -0,15   | 33,80            | 0,20    | 0,00        | -0,52   | 0,00    | 0,00    | 24,00       |  |
| Iso carbo organge                            | Victory endurance | 40                   | 2 serving      | 133,20         | -0,24   | 33,30            | 0,08    | 0,00        | -0,52   | 0,00    | 0,00    | 162,70      |  |
| Energy carbo charge chocolate                | Keepgoing         | 55                   | 3 serving      | 195,45         | 2,88    | 41,50            | 2,27    | 5,00        | 2,09    | 1,05    | 6,56    | 44,00       |  |
| Longovit 360 mango-maracuyá                  | Nutrinovex        | 40                   | 2 serving      | 141,27         | 0,16    | 34,50            | 0,40    | 0,76        | -0,13   | 0,03    | 0,16    | 0,00        |  |

|                                        |                       |      |           | >250 mg sodium |       |       |       |      |       |      |      |         |
|----------------------------------------|-----------------------|------|-----------|----------------|-------|-------|-------|------|-------|------|------|---------|
| Isodrink & energy limón                | Crown sport nutrition | 48   | 3 serving | 170,40         | 1,62  | 39,00 | 1,60  | 3,60 | 1,36  | 0,00 | 0,00 | 345,00  |
| Isodrink & energy frutos rojos         | Crown sport nutrition | 48   | 3 serving | 170,40         | 1,62  | 39,00 | 1,60  | 3,60 | 1,36  | 0,00 | 0,00 | 345,00  |
| Aubisque                               | Geo                   | 35   | 2 serving | 128,00         | -0,50 | 32,00 | -0,27 |      | -0,52 |      | 0,00 | 375,00  |
| Nd4                                    | Infisport             | 39   | 2 serving | 132,00         | -0,30 | 30,00 | -0,80 | 3,00 | 1,05  | 0,00 | 0,00 | 500,00  |
| Drink salts sabor limón                | Infisport             | 40   | 2 sreving | 144,00         | 0,30  | 36,00 | 0,80  | 0,00 | -0,52 | 0,00 | 0,00 | 575,00  |
| Drink salts sabor naranja              | Infisport             | 40   | 2 sreving | 140,00         | 0,10  | 35,00 | 0,53  | 0,00 | -0,52 | 0,00 | 0,00 | 575,00  |
| Hydrasport                             | Recuperat-ion         | 40   | 2 serving | 128,00         | -0,50 | 32,00 | -0,27 | 0,00 | -0,52 | 0,00 | 0,00 | 1036,00 |
| Enervit g endurance sports con cafeína | Enervit               | 45   | 3 serving | 154,80         | 0,84  | 38,70 | 1,52  | 0,00 | -0,52 | 0,00 | 0,00 | 315,00  |
| Sub9 energy drink - watermelon         | 226ers                | 37,5 | 3 serving | 132,00         | -0,30 | 28,50 | -1,20 | 4,50 | 1,83  | 0,00 | 0,00 | 497,93  |
| Sub9 energy drink - mango              | 226ers                | 37,5 | 3 serving | 130,40         | -0,38 | 28,10 | -1,31 | 4,50 | 1,83  | 0,00 | 0,00 | 498,08  |
| Iso energy orange                      | Victory endurance     | 40   | 2 servirg | 136,00         | -0,10 | 32,00 | -0,27 | 2,00 | 0,52  | 0,00 | 0,00 | 272,00  |
| Iso energy orange-mandarina            | Victory endurance     | 40   | 2 servirg | 136,00         | -0,10 | 32,00 | -0,27 | 2,00 | 0,52  | 0,00 | 0,00 | 272,00  |
| Iso energy lemon                       | Victory endurance     | 40   | 2 servirg | 141,20         | 0,16  | 33,30 | 0,08  | 2,00 | 0,52  | 0,00 | 0,00 | 272,00  |
| Iso energy ice blue                    | Victory endurance     | 40   | 2 servirg | 136,00         | -0,10 | 32,00 | -0,27 | 2,00 | 0,52  | 0,00 | 0,00 | 272,00  |
| Nitro energy drink blood orange        | Victory endurance     | 40   | 2 servirg | 148,40         | 0,52  | 34,70 | 0,45  | 2,40 | 0,73  | 0,00 | 0,00 | 368,00  |
| Bebida isotónica orange                | Weider                | 40   | 2 servirg | 149,20         | 0,56  | 37,30 | 1,15  | 0,00 | -0,52 | 0,00 | 0,00 | 336,00  |
| Isotonic                               | Etixx                 | 35   | 2 servirg | 124,80         | -0,66 | 31,20 | -0,48 | 0,00 | -0,52 | 0,00 | 0,00 | 276,00  |
| Isotonic orange                        | Etixx                 | 35   | 2 servirg | 121,60         | -0,82 | 30,40 | -0,69 | 0,00 | -0,52 | 0,00 | 0,00 | 280,00  |
| Isotonic orange-mango                  | Etixx                 | 35   | 2 servirg | 124,80         | -0,66 | 31,20 | -0,48 | 0,00 | -0,52 | 0,00 | 0,00 | 276,00  |
| Isotonic watermelon                    | Etixx                 | 35   | 2 servirg | 124,80         | -0,66 | 31,20 | -0,48 | 0,00 | -0,52 | 0,00 | 0,00 | 276,00  |
| Powerade® ice storm                    | Cocacola              | 500  | 1 serving | 100,00         | -1,91 | 25,00 | -2,13 | 0,00 | -0,52 | 0,00 | 0,00 | 260,00  |
| Powerade® citrus charge                | Cocacola              | 500  | 1 serving | 104,00         | -1,71 | 26,00 | -1,87 | 0,00 | -0,52 | 0,00 | 0,00 | 260,00  |

|                                      |           |     |           |               |       |              |       |               |       |               |      |        |
|--------------------------------------|-----------|-----|-----------|---------------|-------|--------------|-------|---------------|-------|---------------|------|--------|
| Powerade® blood orange               | Cocacola  | 500 | 1 serving | 100,00        | -1,91 | 25,00        | -2,13 | 0,00          | -0,52 | 0,00          | 0,00 | 260,00 |
| Triforza energy lemon                | Keepgoing | 50  | 3 serving | 172,98        | 1,75  | 37,70        | 1,25  | 5,32          | 2,26  | 0,10          | 0,63 | 360,00 |
| Triforza energy hawaiian tropical    | Keepgoing | 50  | 3 serving | 171,69        | 1,69  | 37,40        | 1,17  | 5,32          | 2,26  | 0,09          | 0,56 | 356,00 |
| Triforza energy green apple          | Keepgoing | 50  | 3 serving | 173,28        | 1,77  | 37,73        | 1,26  | 5,32          | 2,26  | 0,12          | 0,75 | 360,00 |
| Triforza energy mixed berries        | Keepgoing | 50  | 3 serving | 170,13        | 1,61  | 37,00        | 1,07  | 5,33          | 2,27  | 0,09          | 0,56 | 356,00 |
| <b>Media</b>                         |           |     |           | <b>137,25</b> |       | <b>32,95</b> |       | <b>1,32</b>   |       | <b>0,03</b>   |      |        |
| <b>Deviation</b>                     |           |     |           | <b>19,94</b>  |       | <b>3,75</b>  |       | <b>1,91</b>   |       | <b>0,16</b>   |      |        |
| <b>Coefficient of Variation (CV)</b> |           |     |           | <b>14,53</b>  |       | <b>11,38</b> |       | <b>144,96</b> |       | <b>481,04</b> |      |        |

| SPORTS GELS GROUP                   | EXCHANGE VALUE    |                      |                | 101                       | -0,02   | 25,00            | -0,03   | 0           | -0,57   | 0       | -0,40   |             |  |
|-------------------------------------|-------------------|----------------------|----------------|---------------------------|---------|------------------|---------|-------------|---------|---------|---------|-------------|--|
| Product name                        | Brand name        | Net weight (g or ml) | Serving dosage | Energy (Kcal)             | Z value | Carbohydrate (g) | Z value | Protein (g) | Z value | Fat (g) | Z value | Sodium (mg) |  |
|                                     |                   |                      |                | <b>&lt; 100 mg sodium</b> |         |                  |         |             |         |         |         |             |  |
| Gel energy cítrico                  | Biofrutal sport   | 30                   | 1 serving      | 92,40                     | -0,50   | 23,10            | -0,45   | 0,00        | 0,00    | 0,00    | 0,00    | 0,00        |  |
| Gel energy manzana                  | Biofrutal sport   | 30                   | 1 serving      | 92,40                     | -0,50   | 23,10            | -0,45   | 0,00        | 0,00    | 0,00    | 0,00    | 0,00        |  |
| Gel energy sprint final             | Biofrutal sport   | 30                   | 1 serving      | 102,00                    | 0,06    | 25,50            | 0,12    | 0,00        | 0,00    | 0,00    | 0,00    | 0,00        |  |
| Gel energy sprint final + cafeína   | Biofrutal sport   | 30                   | 1 serving      | 98,40                     | -0,15   | 24,60            | -0,09   | 0,00        | 0,00    | 0,00    | 0,00    | 0,00        |  |
| Gluco gel                           | Glucoup! - gluco  | 50                   | 2 serving      | 113,44                    | 0,72    | 28,36            | 0,79    | 0,00        | 0,00    | 0,00    | 0,00    | 0,00        |  |
| Gluco juice                         | Glucoup! - gluco  | 120                  | 2 serving      | 121,60                    | 1,19    | 30,40            | 1,27    | 0,00        | 0,00    | 0,00    | 0,00    | 0,00        |  |
| Pump gel lemon                      | Victory endurance | 42                   | 1 serving      | 96,00                     | -0,29   | 24,00            | -0,24   | 0,00        | 0,00    | 0,00    | 0,00    | 0,00        |  |
| Energy gels                         | Etixx             | 38                   | 1 serving      | 96,00                     | -0,29   | 24,00            | -0,24   | 0,00        | 0,00    | 0,00    | 0,00    | 0,00        |  |
| Ginseng and Guarana Energy Gel      | ETIXX             | 50                   | 1 serving      | 120,00                    | 1,10    | 30,00            | 1,18    | 0,00        | 0,00    | 0,00    | 0,00    | 0,00        |  |
| Enervit sport liquid gel – te verde | Enervit           | 60                   | 1 serving      | 112,80                    | 0,68    | 28,20            | 0,75    | 0,00        | 0,00    | 0,00    | 0,00    | 3,12        |  |
| Enervit sport liquid gel – limón    | Enervit           | 60                   | 1 serving      | 112,80                    | 0,68    | 28,20            | 0,75    | 0,00        | 0,00    | 0,00    | 0,00    | 3,12        |  |

|                                                     |                   |    |           |        |       |       |       |      |      |      |      |       |
|-----------------------------------------------------|-------------------|----|-----------|--------|-------|-------|-------|------|------|------|------|-------|
| Enervit sport liquid gel – naranja                  | Enervit           | 60 | 1 serving | 112,80 | 0,68  | 28,20 | 0,75  | 0,00 | 0,00 | 0,00 | 0,00 | 3,12  |
| Enervit sport liquid gel competition – cereza       | Enervit           | 60 | 1 serving | 112,80 | 0,68  | 28,20 | 0,75  | 0,00 | 0,00 | 0,00 | 0,00 | 3,12  |
| Enervite sport liquid gel competition – cítricos    | Enervit           | 60 | 1 serving | 112,32 | 0,65  | 28,08 | 0,72  | 0,00 | 0,00 | 0,00 | 0,00 | 3,12  |
| Energy boost gel orange                             | Victory endurance | 42 | 1 serving | 97,60  | -0,20 | 24,40 | -0,14 | 0,00 | 0,00 | 0,00 | 0,00 | 13,00 |
| Hydro energy apple                                  | Victory endurance | 70 | 1 serving | 96,00  | -0,29 | 24,00 | -0,24 | 0,00 | 0,00 | 0,00 | 0,00 | 14,00 |
| Hydro energy caffeine red fruits                    | Victory endurance | 70 | 1 serving | 96,00  | -0,29 | 24,00 | -0,24 | 0,00 | 0,00 | 0,00 | 0,00 | 16,00 |
| Gel energético con cafeína                          | Enervit           | 25 | 1 serving | 71,20  | -1,72 | 17,80 | -1,69 | 0,00 | 0,00 | 0,00 | 0,00 | 30,00 |
| Energy gel 100 BOX                                  | Maurten           | 40 | 1 serving | 100,00 | -0,06 | 25,00 | 0,00  | 0,00 | 0,00 | 0,00 | 0,00 | 34,00 |
| Energía Gel 44g Lemon-Fresh [40mg cafeína]          | Nutrixxion        | 44 | 1 serving | 118,95 | 1,03  | 29,60 | 1,08  | 0,14 | 0,50 | 0,00 | 0,00 | 36,00 |
| Energía Gel 44g Cola Lemon [40mg cafeína]           | Nutrixxion        | 44 | 1 serving | 118,95 | 1,03  | 29,60 | 1,08  | 0,14 | 0,50 | 0,00 | 0,00 | 36,00 |
| Energía Gel 44g XX Force Green Apple [80mg cafeína] | Nutrixxion        | 44 | 1 serving | 117,14 | 0,93  | 28,51 | 0,83  | 0,77 | 2,80 | 0,00 | 0,00 | 36,00 |
| Energía Gel 44g XX Force Original [80mg cafeína]    | Nutrixxion        | 44 | 1 serving | 117,14 | 0,93  | 28,51 | 0,83  | 0,77 | 2,80 | 0,00 | 0,00 | 36,00 |
| Energía Gel 44g Lakritz [40mg cafeína]              | Nutrixxion        | 44 | 1 serving | 117,43 | 0,95  | 29,22 | 0,99  | 0,14 | 0,50 | 0,00 | 0,00 | 36,00 |
| Energía Gel 44g Waldmeister                         | Nutrixxion        | 44 | 1 serving | 118,95 | 1,03  | 29,60 | 1,08  | 0,14 | 0,50 | 0,00 | 0,00 | 36,00 |
| Energía Gel 44g Orange [40mg cafeína]               | Nutrixxion        | 44 | 1 serving | 118,95 | 1,03  | 29,60 | 1,08  | 0,14 | 0,50 | 0,00 | 0,00 | 36,00 |
| Energía Gel 44g Banana                              | Nutrixxion        | 44 | 1 serving | 118,95 | 1,03  | 29,60 | 1,08  | 0,14 | 0,50 | 0,00 | 0,00 | 36,00 |
| Energía Gel 44g Citrus                              | Nutrixxion        | 44 | 1 serving | 92,40  | -0,50 | 23,10 | -0,45 | 0,00 | 0,00 | 0,00 | 0,00 | 0,00  |
| Energía Gel 44g Vanilla-Strawberry                  | Nutrixxion        | 44 | 1 serving | 92,40  | -0,50 | 23,10 | -0,45 | 0,00 | 0,00 | 0,00 | 0,00 | 0,00  |
| Energie Gel 44g Strawberry                          | Nutrixxion        | 44 | 1 serving | 102,00 | 0,06  | 25,50 | 0,12  | 0,00 | 0,00 | 0,00 | 0,00 | 0,00  |
| Gel energético                                      | Enervit           | 25 | 1 serving | 98,40  | -0,15 | 24,60 | -0,09 | 0,00 | 0,00 | 0,00 | 0,00 | 0,00  |
| Gel energy elite                                    | Myprotein         | 50 | 1 serving | 113,44 | 0,72  | 28,36 | 0,79  | 0,00 | 0,00 | 0,00 | 0,00 | 0,00  |

|                                           |                       |    |           |                          |       |       |       |      |      |      |      |        |
|-------------------------------------------|-----------------------|----|-----------|--------------------------|-------|-------|-------|------|------|------|------|--------|
| Energy boost gel + caffeine cola          | Victory endurance     | 42 | 1 serving | 121,60                   | 1,19  | 30,40 | 1,27  | 0,00 | 0,00 | 0,00 | 0,00 | 0,00   |
| Energy boost gel + caffeine red energy    | Victory endurance     | 42 | 1 serving | 96,00                    | -0,29 | 24,00 | -0,24 | 0,00 | 0,00 | 0,00 | 0,00 | 0,00   |
|                                           |                       |    |           | <b>100-200 mg sodium</b> |       |       |       |      |      |      |      |        |
| Energy up gel lemon                       | Victory endurance     | 40 | 1 serving | 104,00                   | 0,17  | 26,00 | 0,24  | 0,00 | 0,00 | 0,00 | 0,00 | 100,00 |
| Energy up gel naranja                     | Victory endurance     | 40 | 1 serving | 104,00                   | 0,17  | 26,00 | 0,24  | 0,00 | 0,00 | 0,00 | 0,00 | 100,00 |
| Energy up gel sandía                      | Victory endurance     | 40 | 1 serving | 104,00                   | 0,17  | 26,00 | 0,24  | 0,00 | 0,00 | 0,00 | 0,00 | 100,00 |
| Energy up! + caffeine mojito              | Victory endurance     | 40 | 1 serving | 96,00                    | -0,29 | 24,00 | -0,24 | 0,00 | 0,00 | 0,00 | 0,00 | 100,00 |
| Energy up! + caffeine cola                | Victory endurance     | 40 | 1 serving | 96,00                    | -0,29 | 24,00 | -0,24 | 0,00 | 0,00 | 0,00 | 0,00 | 100,00 |
| Energy up! + caffeine tropical            | Victory endurance     | 40 | 1 serving | 96,00                    | -0,29 | 24,00 | -0,24 | 0,00 | 0,00 | 0,00 | 0,00 | 100,00 |
| Energy Gel sabor cola con cafeína         | Crown Sport Nutrition | 40 | 1 serving | 104,48                   | 0,20  | 25,40 | 0,09  | 0,72 | 2,60 | 0,00 | 0,00 | 110,00 |
| Energy Gel sabor Frutos Rojos con cafeína | Crown Sport Nutrition | 40 | 1 serving | 105,28                   | 0,25  | 25,60 | 0,14  | 0,72 | 2,60 | 0,00 | 0,00 | 110,00 |
| Energy Gel sabor limón                    | Crown Sport Nutrition | 40 | 1 serving | 106,48                   | 0,32  | 25,90 | 0,21  | 0,72 | 2,60 | 0,00 | 0,00 | 112,00 |
| Energy Gel sabor Naranja                  | Crown Sport Nutrition | 40 | 1 serving | 105,28                   | 0,25  | 25,60 | 0,14  | 0,72 | 2,60 | 0,00 | 0,00 | 112,00 |
| Bio energy gel - sabor frutas del bosque  | 226ers                | 25 | 1 serving | 73,18                    | -1,60 | 18,08 | -1,63 | 0,05 | 0,20 | 0,08 | 1,50 | 154,50 |
| Bio energy gel - sabor café               | 226ers                | 25 | 1 serving | 73,05                    | -1,61 | 18,13 | -1,62 | 0,03 | 0,10 | 0,05 | 1,00 | 154,75 |
| BIO ENERGY GEL - SABOR piña & COCO        | 226ERS                | 25 | 1 serving | 73,75                    | -1,57 | 18,28 | -1,58 | 0,05 | 0,20 | 0,05 | 1,00 | 154,75 |
| Bio energy gel - sabor limon              | 226ers                | 25 | 1 serving | 72,88                    | -1,62 | 18,00 | -1,65 | 0,05 | 0,20 | 0,08 | 1,50 | 154,75 |
| Bio energy gel - sabor fresa y plátano    | 226ers                | 25 | 1 serving | 73,85                    | -1,56 | 18,30 | -1,58 | 0,05 | 0,20 | 0,05 | 1,00 | 155,00 |
| Bio energy gel - sabor cola               | 226ers                | 25 | 1 serving | 73,45                    | -1,59 | 18,23 | -1,59 | 0,03 | 0,10 | 0,05 | 1,00 | 157,00 |

|                                        |                          |    |           |                                      |               |       |              |      |               |      |               |        |  |
|----------------------------------------|--------------------------|----|-----------|--------------------------------------|---------------|-------|--------------|------|---------------|------|---------------|--------|--|
| Bio energy gel - sabor melon           | 226ers                   | 25 | 1 serving | 73,55                                | -1,58         | 18,25 | -1,59        | 0,03 | 0,10          | 0,05 | 1,00          | 157,00 |  |
| Bio energy gel - sabor mango           | 226ers                   | 25 | 1 serving | 73,75                                | -1,57         | 18,30 | -1,58        | 0,03 | 0,10          | 0,05 | 1,00          | 157,35 |  |
| GEL ORAL sabor limón                   | Infisport                | 50 | 1 serving | 130,00                               | 1,67          | 31,70 | 1,58         | 0,80 | 2,90          | 0,00 | 0,00          | 160,00 |  |
| GEL ORAL sabor naranja                 | Infisport                | 50 | 1 serving | 120,40                               | 1,12          | 29,30 | 1,01         | 0,80 | 2,90          | 0,00 | 0,00          | 170,00 |  |
| ND3 CROSS UP sabor frutos del bosque   | Infisport                | 50 | 1 serving | 124,36                               | 1,35          | 30,20 | 1,22         | 0,89 | 3,20          | 0,00 | 0,00          | 180,00 |  |
| ND3 CROSS UP sabor limón               | Infisport                | 50 | 1 serving | 121,52                               | 1,18          | 29,65 | 1,09         | 0,73 | 2,60          | 0,00 | 0,00          | 185,00 |  |
| GEL ORAL sabor cola                    | Infisport                | 50 | 1 serving | 123,16                               | 1,28          | 29,85 | 1,14         | 0,94 | 3,40          | 0,00 | 0,00          | 190,00 |  |
| Gel energy                             | Recuperat-ion            | 32 | 1 serving | 72,00                                | -1,67         | 18,00 | -1,65        | 0,00 | 0,00          | 0,00 | 0,00          | 200,00 |  |
|                                        |                          |    |           | <b>&gt; 200 mg sodium</b>            |               |       |              |      |               |      |               |        |  |
| Isotonic energy gel                    | Etixx                    | 40 | 1 serving | 96,00                                | -0,29         | 24,00 | -0,24        | 0,00 | 0,00          | 0,00 | 0,00          | 220,00 |  |
| Bio energy gel - sabor regaliz         | 226ers                   | 25 | 1 serving | 73,05                                | -1,61         | 18,13 | -1,62        | 0,03 | 0,10          | 0,05 | 1,00          | 241,00 |  |
| Bio energy gel - sabor caramel         | 226ers                   | 25 | 1 serving | 74,65                                | -1,52         | 18,28 | -1,58        | 0,05 | 0,20          | 0,15 | 3,00          | 243,25 |  |
| Bio energy gel - sabor fresa y plátano | 226ers                   | 40 | 1 serving | 118,10                               | 0,99          | 29,30 | 1,01         | 0,00 | 0,00          | 0,10 | 2,00          | 248,00 |  |
| Bio energy gel - sabor cola            | 226ers                   | 40 | 1 serving | 117,70                               | 0,96          | 29,20 | 0,99         | 0,00 | 0,00          | 0,10 | 2,00          | 251,00 |  |
| Bio energy gel - sabor melon           | 226ers                   | 40 | 1 serving | 117,70                               | 0,96          | 29,20 | 0,99         | 0,00 | 0,00          | 0,10 | 2,00          | 251,00 |  |
| Bio energy gel - sabor caramelo        | 226ers                   | 40 | 1 serving | 119,90                               | 1,09          | 29,20 | 0,99         | 0,10 | 0,40          | 0,30 | 6,00          | 389,40 |  |
| Dextro drink                           | Glucoup! - dextro energy | 50 | 1 serving | 96,00                                | -0,29         | 24,00 | -0,24        | 0,00 | 0,00          | 0,00 | 0,00          |        |  |
| Gel energy & activation mixed berries  | Keepgoing                | 32 | 1 serving | 83,17                                | -1,03         | 20,50 | -1,06        | 0,22 | 0,80          | 0,03 | 0,64          |        |  |
| Gel energy & endurance citrus          | Keepgoing                | 32 | 1 serving | 84,48                                | -0,95         | 20,80 | -0,99        | 0,32 | 1,10          | 0,00 | 0,00          |        |  |
| Gel energy & recovery mandarine        | Keepgoing                | 32 | 1 serving | 84,17                                | -0,97         | 20,80 | -0,99        | 0,22 | 0,80          | 0,01 | 0,20          |        |  |
| Longovit Gel Fresa y Plátano           | Nutrinovex               | 60 | 1 serving | 66,30                                | -2,00         | 15,80 | -2,16        | 0,77 | 2,80          | 0,00 | 0,04          | 0,00   |  |
| Longovit gel manzana                   | Nutrinovex               | 60 | 1 serving | 82,4                                 | -1,07         | 20    | -1,18        | 0,6  | 2,1           | 0    | 0             | 0,144  |  |
|                                        |                          |    |           | <b>Media</b>                         | <b>101,28</b> |       | <b>25,12</b> |      | <b>0,16</b>   |      | <b>0,02</b>   |        |  |
|                                        |                          |    |           | <b>Deviation</b>                     | <b>17,35</b>  |       | <b>4,25</b>  |      | <b>0,28</b>   |      | <b>0,05</b>   |        |  |
|                                        |                          |    |           | <b>Coefficient of Variation (CV)</b> | <b>17,14</b>  |       | <b>16,93</b> |      | <b>175,73</b> |      | <b>249,30</b> |        |  |

| <b>SPORTS BARS GROUP</b><br>Subgroup 1. <25 g<br>carbohydrate | <b>EXCHANGE VALUE</b> |                             |                       | <b>118</b>           | <b>0,05</b>    | <b>24,00</b>            | <b>0,01</b>    | <b>1</b>           | <b>-0,24</b>   | <b>2</b>       | <b>0,08</b>    |
|---------------------------------------------------------------|-----------------------|-----------------------------|-----------------------|----------------------|----------------|-------------------------|----------------|--------------------|----------------|----------------|----------------|
| <b>Produt name</b>                                            | <b>Brand name</b>     | <b>Net weight (g or ml)</b> | <b>Serving dosage</b> | <b>Energy (Kcal)</b> | <b>Z value</b> | <b>Carbohydrate (g)</b> | <b>Z value</b> | <b>Protein (g)</b> | <b>Z value</b> | <b>Fat (g)</b> | <b>Z value</b> |
| Longovit plátano                                              | Nutrinove x           | 30                          | 1 serving             | 124,71               | 0,13           | 18,06                   | -1,61          | 2,07               | 0,95           | 4,91           | 1,61           |
| Longovit Tarta de queso                                       | Nutrinove x           | 30                          | 1 serving             | 119,99               | -0,10          | 16,67                   | -1,99          | 2,10               | 0,97           | 4,99           | 1,65           |
| Faster bar sabor frambuesa                                    | Infisport             | 25                          | 1 serving             | 78,10                | -2,08          | 19,00                   | -1,36          | 0,30               | -0,62          | 0,10           | -1,05          |
| Tropical                                                      | Geo                   | 40                          | 1 serving             | 111,30               | -0,51          | 23,00                   | -0,27          | 1,00               | 0,00           | 1,70           | -0,17          |
| Manzana - canela                                              | Geo                   | 40                          | 1 serving             | 117,00               | -0,24          | 24,10                   | 0,03           | 1,10               | 0,09           | 1,80           | -0,11          |
| Chocolate                                                     | Geo                   | 40                          | 1 serving             | 126,50               | 0,21           | 20,80                   | -0,87          | 2,50               | 1,33           | 3,70           | 0,94           |
| Faster bar sabor naranja-limón                                | INFISPORT             | 25                          | 1 serving             | 81,90                | -1,90          | 20,00                   | -1,09          | 0,25               | -0,66          | 0,10           | -1,05          |
| Energy sport bar chocolate                                    | Etixx                 | 40                          | 1 serving             | 143,30               | 1,01           | 29,00                   | 1,36           | 2,10               | 0,97           | 2,10           | 0,06           |
| Energy sport bar orange                                       | Etixx                 | 40                          | 1 serving             | 142,10               | 0,95           | 29,00                   | 1,36           | 1,80               | 0,71           | 2,10           | 0,06           |
| Energy fruit mixed berries                                    | Keepgoing             | 40                          | 1 serving             | 150,14               | 1,34           | 25,95                   | 0,53           | 2,90               | 1,68           | 3,86           | 1,03           |
| Energy fruit banana                                           | Keepgoing             | 40                          | 1 serving             | 137,77               | 0,75           | 24,84                   | 0,23           | 2,65               | 1,46           | 3,09           | 0,60           |
| Energy fruit orange                                           | Keepgoing             | 40                          | 1 serving             | 136,97               | 0,71           | 24,85                   | 0,23           | 2,71               | 1,51           | 2,97           | 0,54           |
| Glucobar fresa                                                | Nutrinove x           | 35                          | 1 serving             | 105,32               | -0,79          | 26,18                   | 0,59           | 0,07               | -0,82          | 0,04           | -1,09          |
| Glucobar cola                                                 | Nutrinove x           | 35                          | 1 serving             | 105,60               | -0,78          | 26,32                   | 0,63           | 0,00               | -0,88          | 0,04           | -1,09          |
| Glucobar kiwi                                                 | Nutrinove x           | 35                          | 1 serving             | 97,68                | -1,16          | 24,34                   | 0,09           | 0,00               | -0,88          | 0,04           | -1,09          |
| Glucobar lima limón                                           | Nutrinove x           | 35                          | 1 serving             | 105,60               | -0,78          | 26,32                   | 0,63           | 0,00               | -0,88          | 0,04           | -1,09          |
| Glucobar plátano                                              | Nutrinove x           | 35                          | 1 serving             | 105,12               | -0,80          | 26,20                   | 0,60           | 0,00               | -0,88          | 0,04           | -1,09          |
|                                                               |                       |                             |                       | <b>Media</b>         | <b>117,00</b>  |                         | <b>23,80</b>   |                    | <b>1,27</b>    |                | <b>1,86</b>    |
|                                                               |                       |                             |                       | <b>Deviation</b>     | <b>21,06</b>   |                         | <b>3,68</b>    |                    | <b>1,13</b>    |                | <b>1,81</b>    |

|                                      |       |       |       |       |
|--------------------------------------|-------|-------|-------|-------|
| <b>Coefficient of Variation (CV)</b> | 18,00 | 15,45 | 89,12 | 97,21 |
|--------------------------------------|-------|-------|-------|-------|

| <b>SPORTS BARS GROUP</b><br><u>Subgroup 2. &gt;30 g carbohydrate, 2 g of fat, and 2 g of protein.</u> | <b>EXCHANGE VALUE</b> |                             |                       | <b>166</b>           | <b>-0,04</b>   | <b>35,00</b>            | <b>0,08</b>    | <b>2</b>           | <b>-0,15</b>   | <b>2</b>       | <b>-0,15</b>   |
|-------------------------------------------------------------------------------------------------------|-----------------------|-----------------------------|-----------------------|----------------------|----------------|-------------------------|----------------|--------------------|----------------|----------------|----------------|
| <b>Product name</b>                                                                                   | <b>Brand name</b>     | <b>Net weight (g or ml)</b> | <b>Serving dosage</b> | <b>Energy (Kcal)</b> | <b>Z value</b> | <b>Carbohydrate (g)</b> | <b>Z value</b> | <b>Protein (g)</b> | <b>Z value</b> | <b>Fat (g)</b> | <b>Z value</b> |
| Energy sport bar lemon                                                                                | Etixx                 | 40                          | 1 serving             | 153,3                | -0,4           | 30,0                    | -1,1           | 1,8                | -0,1           | 2,9            | 0,5            |
| Energy sport bar raspberry                                                                            | Etixx                 | 40                          | 1 serving             | 145,2                | -0,5           | 30,0                    | -1,1           | 1,8                | -0,1           | 2,0            | 0,0            |
| Evo bar - oat & prebiotics - multifrutas                                                              | 226ers                | 60                          | 1 serving             | 214,8                | 0,8            | 41,9                    | 1,5            | 4,1                | 1,5            | 3,4            | 0,8            |
| Enervit power sport competition – naranja (sin gluten)                                                | Enervit               | 60                          | 1 serving             | 210,1                | 0,7            | 46,2                    | 2,5            | 2,3                | 0,2            | 1,8            | -0,1           |
| ND3 SOLID sabor citrico                                                                               | INFISPORT             | 40                          | 1 serving             | 127,3                | -0,8           | 30,3                    | -1,0           | 0,4                | -1,1           | 0,5            | -0,9           |
| ND3 SOLID sabor citrico cafeina                                                                       | INFISPORT             | 40                          | 1 serving             | 128,5                | -0,8           | 30,6                    | -1,0           | 0,4                | -1,1           | 0,5            | -0,9           |
| ND3 SOLID granada                                                                                     | INFISPORT             | 40                          | 1 serving             | 130,5                | -0,8           | 31,0                    | -0,9           | 0,5                | -1,1           | 0,5            | -0,9           |
| ND3 SOLID granada cafeina                                                                             | INFISPORT             | 40                          | 1 serving             | 122,1                | -0,9           | 30,1                    | -1,1           | 0,4                | -1,1           | 0,0            | -1,2           |
| Fruit bar                                                                                             | Infisport             | 40                          | 1 serving             | 136,1                | -0,7           | 30,8                    | -0,9           | 1,2                | -0,6           | 0,9            | -0,7           |
| Energia barrita fruit                                                                                 | Nutrixion             | 55                          | 1 serving             | 187,1                | 0,2            | 35,3                    | 0,1            | 3,0                | 0,7            | 3,8            | 1,1            |
| Energía barrita banana 55g                                                                            | Nutrixion             | 55                          | 1 serving             | 188,7                | 0,3            | 35,6                    | 0,1            | 2,9                | 0,7            | 3,9            | 1,1            |
| Energía barrita salty nut 55g                                                                         | Nutrixion             | 55                          | 1 serving             | 188,0                | 0,3            | 33,9                    | -0,3           | 3,9                | 1,3            | 4,1            | 1,3            |
| Endurance fuel bar con bcaa's - plátano y jengibre                                                    | 226ers                | 60                          | 1 serving             | 165,8                | -0,1           | 37,3                    | 0,5            | 4,0                | 1,4            | 0,1            | -1,1           |
| Endurance fuel bar con bcaa's - manzana y canela                                                      | 226ers                | 60                          | 1 serving             | 195,5                | 0,4            | 41,3                    | 1,4            | 3,4                | 1,0            | 1,9            | -0,1           |



|                                                        |            |    |           |                                      |              |      |      |             |      |             |      |             |
|--------------------------------------------------------|------------|----|-----------|--------------------------------------|--------------|------|------|-------------|------|-------------|------|-------------|
| Endurance fuel bar con bcaa's - chocolate              | 226ers     | 60 | 1 serving | 201,5                                | 0,5          | 35,3 | 0,1  | 5,0         | 2,1  | 4,5         | 1,5  |             |
| Endurance fuel bar con choco bits - limon              | 226ers     | 60 | 1 serving | 197,3                                | 0,4          | 36,3 | 0,3  | 3,3         | 0,9  | 4,3         | 1,4  |             |
| Endurance fuel bar con choco bits - cafe y cacao       | 226ers     | 60 | 1 serving | 191,0                                | 0,3          | 37,8 | 0,6  | 2,9         | 0,7  | 3,1         | 0,7  |             |
| Endurance fuel bar con white choco bits - fresa        | 226ers     | 60 | 1 serving | 153,3                                | -0,4         | 30,0 | -1,1 | 1,8         | -0,1 | 2,9         | 0,5  |             |
| Endurance fuel bar con chia - sabor italian            | 226ers     | 60 | 1 serving | 145,2                                | -0,5         | 30,0 | -1,1 | 1,8         | -0,1 | 2,0         | 0,0  |             |
| Evo bar - superfoods energy- arandanos, nueces y maca  | 226ers     | 50 | 1 serving | 214,8                                | 0,8          | 41,9 | 1,5  | 4,1         | 1,5  | 3,4         | 0,8  |             |
| Evo bar - superfoods energy - plátano, avellana y maca | 226ers     | 50 | 1 serving | 210,1                                | 0,7          | 46,2 | 2,5  | 2,3         | 0,2  | 1,8         | -0,1 |             |
| Triforza bar strawberry                                | Keepgoin g | 40 | 1 serving | 127,3                                | -0,8         | 30,3 | -1,0 | 0,4         | -1,1 | 0,5         | -0,9 |             |
| Triforza bar mandarine                                 | Keepgoin g | 40 | 1 serving | 128,5                                | -0,8         | 30,6 | -1,0 | 0,4         | -1,1 | 0,5         | -0,9 |             |
| Triforza bar albaricoque                               | Keepgoin g | 40 | 1 serving | 130,5                                | -0,8         | 31,0 | -0,9 | 0,5         | -1,1 | 0,5         | -0,9 |             |
|                                                        |            |    |           | <b>Media</b>                         | <b>167,5</b> |      |      | <b>34,6</b> |      | <b>2,2</b>  |      | <b>2,2</b>  |
|                                                        |            |    |           | <b>Desviación</b>                    | <b>33,3</b>  |      |      | <b>4,5</b>  |      | <b>1,4</b>  |      | <b>1,7</b>  |
|                                                        |            |    |           | <b>Coefficient of Variation (CV)</b> | <b>19,9</b>  |      |      | <b>13,0</b> |      | <b>64,7</b> |      | <b>76,3</b> |

| <b>SPORTS BARS GROUP</b>                                                  |                       |                             |                       |                      |                |                         |                |                    |                |                |                |            |
|---------------------------------------------------------------------------|-----------------------|-----------------------------|-----------------------|----------------------|----------------|-------------------------|----------------|--------------------|----------------|----------------|----------------|------------|
| <u>Subgroup 3. &gt;30 g carbohydrate, 6 g of fat, and 5 g of protein.</u> |                       | <b>EXCHANGE VALUE</b>       |                       |                      | <b>206</b>     | <b>0,10</b>             | <b>33,0</b>    | <b>0,0</b>         | <b>5,0</b>     | <b>0,2</b>     | <b>6,0</b>     | <b>0,0</b> |
| <b>Product name</b>                                                       | <b>Brand name</b>     | <b>Net weight (g or ml)</b> | <b>Serving dosage</b> | <b>Energy (Kcal)</b> | <b>Z value</b> | <b>Carbohydrate (g)</b> | <b>Z value</b> | <b>Protein (g)</b> | <b>Z value</b> | <b>Fat (g)</b> | <b>Z value</b> |            |
| Energy Bar sabor doble chocolate                                          | Crown Sport Nutrition | 60                          | 1 serving             | 228,92               | 1,07           | 32,30                   | -0,16          | 5,76               | 0,33           | 8,52           | 1,68           |            |
| Energy Bar sabor yogur                                                    | Crown Sport Nutrition | 60                          | 1 serving             | 227,12               | 0,99           | 32,90                   | -0,02          | 5,52               | 0,23           | 8,16           | 1,44           |            |
| Energy Bar sabor banana con choco blanco                                  | Crown Sport Nutrition | 60                          | 1 serving             | 228,18               | 1,04           | 35,10                   | 0,48           | 5,34               | 0,15           | 7,38           | 0,92           |            |

|                                                         |                   |    |           |                                      |              |       |             |       |             |      |             |
|---------------------------------------------------------|-------------------|----|-----------|--------------------------------------|--------------|-------|-------------|-------|-------------|------|-------------|
| Energy sport bar nougat                                 | Etixx             | 40 | 1 serving | 179,60                               | -1,23        | 29,00 | -0,91       | 2,40  | -1,13       | 6,00 | 0,00        |
| Nature´s energy bar fresa                               | Victory endurance | 60 | 1 serving | 187,80                               | -0,85        | 29,00 | -0,91       | 3,10  | -0,83       | 6,60 | 0,40        |
| Nature´s energy bar manzana                             | Victory endurance | 60 | 1 serving | 187,80                               | -0,85        | 29,00 | -0,91       | 3,10  | -0,83       | 6,60 | 0,40        |
| Energía barrita fruit yoghurt.                          | Nutrixxion        | 55 | 1 serving | 212,80                               | 0,32         | 34,49 | 0,34        | 2,75  | -0,98       | 7,10 | 0,73        |
| Energía barrita oat raisin                              | Nutrixxion        | 55 | 1 serving | 212,69                               | 0,31         | 35,30 | 0,53        | 3,10  | -0,81       | 6,50 | 0,36        |
| Barritas con proteínas – chocolate                      | Enervit           | 40 | 1 serving | 161,20                               | -2,09        | 23,20 | -2,23       | 7,20  | 0,96        | 4,40 | -1,07       |
| Evo bar - superfoods protein -arandanos, nuecs y maca   | 226ERS            | 50 | 1 serving | 185,75                               | -0,95        | 32,05 | -0,22       | 7,30  | 1,00        | 3,15 | -1,90       |
| Enervit power sport – manzana                           | Enervit           | 60 | 1 serving | 221,16                               | 0,71         | 37,20 | 0,95        | 10,80 | 2,52        | 3,24 | -1,84       |
| Energía Barrita Peanut Choco 55g                        | Nutrixxion        | 55 | 1 serving | 196,41                               | -0,45        | 31,57 | -0,33       | 4,79  | -0,09       | 5,67 | -0,22       |
| Nutrixxion energía barrita cappuccino [40mg koffein]    | Nutrixxion        | 55 | 1 serving | 215,93                               | 0,46         | 38,01 | 1,14        | 2,86  | -0,93       | 5,83 | -0,11       |
| Energy bar                                              | Infisport         | 40 | 1 serving | 176,45                               | -1,38        | 29,20 | -0,86       | 1,93  | -1,33       | 5,77 | -0,15       |
| Endurance fuel bar con chia - sabor indian              | 226ERS            | 60 | 1 serving | 197,34                               | -0,40        | 32,94 | -0,01       | 4,38  | -0,27       | 5,34 | -0,44       |
| Endurance fuel bar - patata y quiqos                    | 226ERS            | 60 | 1 serving | 219,90                               | 0,65         | 38,70 | 1,30        | 3,72  | -0,56       | 5,58 | -0,28       |
| Evo bar - oat & prebiotics - plátano y chocolate blanco | 226ers            | 60 | 1 serving | 228,00                               | 1,03         | 40,92 | 1,80        | 4,20  | -0,35       | 5,28 | -0,48       |
|                                                         |                   |    |           | <b>Media</b>                         | <b>203,9</b> |       | <b>33,0</b> |       | <b>4,6</b>  |      | <b>6,0</b>  |
|                                                         |                   |    |           | <b>Deviation</b>                     | <b>21,4</b>  |       | <b>4,4</b>  |       | <b>2,3</b>  |      | <b>1,5</b>  |
|                                                         |                   |    |           | <b>Coefficient of Variation (CV)</b> | <b>10,5</b>  |       | <b>13,4</b> |       | <b>49,0</b> |      | <b>24,8</b> |

| SPORTS CONFECTIONERY GROUP | EXCHANGE VALUE   |                      |                | 20            | 0,02    | 5,00             | 0,28    | 0,00        | -0,60   | 0,00    | -0,70   |
|----------------------------|------------------|----------------------|----------------|---------------|---------|------------------|---------|-------------|---------|---------|---------|
| Product name               | Brand name       | Net weight (g or ml) | Serving dosage | Energy (Kcal) | Z value | Carbohydrate (g) | Z value | Protein (g) | Z value | Fat (g) | Z value |
| Glucotabs                  | Glucoup! - gluco | 4                    | 1 serving      | 14,40         | -0,97   | 3,60             | -1,09   | 0,00        | 0,00    | 0,00    | 0,00    |

|                                     |                          |      |           |                                      |              |      |              |      |               |      |               |
|-------------------------------------|--------------------------|------|-----------|--------------------------------------|--------------|------|--------------|------|---------------|------|---------------|
| Dextrose cubes                      | Glucoup! - dextro energy | 5,45 | 1 serving | 25,30                                | 0,92         | 5,20 | 0,16         | 0,00 | 0,00          | 0,50 | 3,13          |
| Dixi                                | Glucoup! - instantina    | 4,68 | 4 serving | 16,04                                | -0,69        | 3,92 | -0,84        | 0,00 | 0,00          | 0,04 | 0,25          |
| Dixi max                            | Glucoup! - instantina    | 5,2  | 2 serving | 19,08                                | -0,16        | 4,68 | -0,25        | 0,00 | 0,00          | 0,04 | 0,25          |
| Clio                                | Glucoup! - instantina    | 4,96 | 2 serving | 19,40                                | -0,10        | 4,40 | -0,47        | 0,00 | 0,00          | 0,20 | 1,25          |
| Vegan sport gummies - mango         | 226ers                   | 6    | 1 serving | 13,80                                | -1,08        | 3,34 | -1,29        | 0,08 | 0,70          | 0,01 | 0,08          |
| Vegan sport gummies - cereza y cola | 226ERS                   | 6    | 1 serving | 14,94                                | -0,88        | 3,33 | -1,29        | 0,38 | 3,15          | 0,01 | 0,08          |
| Energy boost gummies                | Victory endurance        | 8    | 1 serving | 27,90                                | 1,37         | 6,64 | 1,27         | 0,11 | 0,92          | 0,10 | 0,63          |
| Energy boost gummies caffeine       | Victory endurance        | 8    | 1 serving | 27,86                                | 1,37         | 6,64 | 1,27         | 0,10 | 0,83          | 0,10 | 0,63          |
|                                     |                          |      |           | <b>Media</b>                         | <b>19,86</b> |      | <b>4,64</b>  |      | <b>0,07</b>   |      | <b>0,11</b>   |
|                                     |                          |      |           | <b>Deviation</b>                     | <b>5,75</b>  |      | <b>1,29</b>  |      | <b>0,12</b>   |      | <b>0,16</b>   |
|                                     |                          |      |           | <b>Coefficient of Variation (CV)</b> | <b>28,95</b> |      | <b>27,88</b> |      | <b>165,30</b> |      | <b>142,26</b> |

| <b>PROTEIN POWDERS GROUP</b><br>Subgroup 1. Between 20 and <25 g protein. |                       | <b>EXCHANGE VALUE</b>       |                       |                      | <b>109</b>     | <b>0,03</b>             | <b>2,00</b>    | <b>-0,10</b>       | <b>23,00</b>   | <b>0,31</b>    | <b>1</b>       | <b>-</b><br><b>0,16068</b><br><b>89</b> |
|---------------------------------------------------------------------------|-----------------------|-----------------------------|-----------------------|----------------------|----------------|-------------------------|----------------|--------------------|----------------|----------------|----------------|-----------------------------------------|
| <b>Product name</b>                                                       | <b>Brand name</b>     | <b>Net weight (g or ml)</b> | <b>Serving dosage</b> | <b>Energy (Kcal)</b> | <b>Z value</b> | <b>Carbohydrate (g)</b> | <b>Z value</b> | <b>Protein (g)</b> | <b>Z value</b> | <b>Fat (g)</b> | <b>Z value</b> |                                         |
| Day & night casein chocolate                                              | Weider                | 25                          | 1 serving             | 89,30                | -2,02          | 1,20                    | -0,85          | 20,00              | -2,59          | 0,50           | -0,75          |                                         |
| Isolate protein drink - chocolate                                         | 226ers                | 25                          | 2 serving             | 90,40                | -1,91          | 2,35                    | 0,37           | 20,25              | -2,37          | 0,00           | -1,49          |                                         |
| Sequential Protein chocolate                                              | Crown Sport Nutrition | 27                          | 1 serving             | 98,07                | -1,12          | 1,34                    | -0,70          | 20,41              | -2,23          | 1,23           | 0,34           |                                         |
| Impact Whey protein                                                       | Myprotein             | 25                          | 1 serving             | 102,88               | -0,63          | 1,00                    | -1,06          | 20,50              | -2,16          | 1,88           | 1,31           |                                         |
| The whey +                                                                | Myprotein             | 32                          | 1 serving             | 91,33                | -1,81          | 1,60                    | -0,43          | 20,50              | -2,16          | 0,33           | -1,01          |                                         |
| Vegan protein - chocolate                                                 | 226ers                | 30                          | 2 serving             | 102,60               | -0,66          | 3,60                    | 1,70           | 20,70              | -1,98          | 0,60           | -0,60          |                                         |
| Lean Protein chocolate                                                    | Weider                | 30                          | 1 serving             | 100,10               | -0,91          | 2,00                    | 0,00           | 21,00              | -1,72          | 0,90           | -0,15          |                                         |
| Enervit proteina 100% whey                                                | Enervit               | 30                          | 1 serving             | 119,82               | 1,11           | 4,50                    | 2,66           | 21,00              | -1,72          | 1,98           | 1,46           |                                         |

|                                          |                       |    |           |        |       |      |       |       |       |      |       |
|------------------------------------------|-----------------------|----|-----------|--------|-------|------|-------|-------|-------|------|-------|
| Vegan protein - red fruits               | 226ers                | 30 | 2 serving | 104,43 | -0,47 | 4,20 | 2,34  | 21,30 | -1,47 | 0,27 | -1,09 |
| Sequential Protein fresa                 | Crown Sport Nutrition | 27 | 1 serving | 101,34 | -0,79 | 1,63 | -0,39 | 21,50 | -1,29 | 0,98 | -0,03 |
| Iso whey hydrolyzed chocolate            | Crown sport nutrition | 27 | 1 serving | 97,50  | -1,18 | 0,80 | -1,28 | 22,00 | -0,86 | 0,70 | -0,45 |
| Day & night casein frutas del bosque     | Weider                | 25 | 1 serving | 93,85  | -1,56 | 0,90 | -1,17 | 22,00 | -0,86 | 0,25 | -1,12 |
| Day & night casein vainilla              | Weider                | 25 | 1 serving | 93,45  | -1,60 | 0,80 | -1,28 | 22,00 | -0,86 | 0,25 | -1,12 |
| Super nitro whey chocolate praliné       | Victory endurance     | 30 | 1 serving | 116,30 | 0,75  | 2,80 | 0,85  | 22,00 | -0,86 | 1,90 | 1,34  |
| ISO WHEY PROTEIN Yogur frutos del bosque | Keepgoing             | 30 | 2 serving | 101,40 | -0,78 | 2,00 | 0,00  | 22,00 | -0,86 | 0,60 | -0,60 |
| Iso whey protei chocolate                | Keepgoing             | 30 | 2 serving | 112,00 | 0,31  | 1,50 | -0,53 | 22,00 | -0,86 | 2,00 | 1,49  |
| Impact Whey isolate                      | Myprotein             | 25 | 1 serving | 93,18  | -1,62 | 0,63 | -1,46 | 22,50 | -0,43 | 0,08 | -1,38 |
| Caseína de acción lenta                  | Myprotein             | 30 | 1 serving | 100,05 | -0,92 | 1,20 | -0,85 | 22,80 | -0,17 | 0,45 | -0,82 |
| Beef & whey                              | Crown sport nutrition | 27 | 1 serving | 104,20 | -0,49 | 0,80 | -1,28 | 23,00 | 0,00  | 1,00 | 0,00  |
| Iso whey hydrolyzed fresa                | Crown sport nutrition | 27 | 1 serving | 100,00 | -0,92 | 1,10 | -0,96 | 23,00 | 0,00  | 0,40 | -0,90 |
| Gold whey banana                         | Weider                | 30 | 1 serving | 117,40 | 0,86  | 2,30 | 0,32  | 23,00 | 0,00  | 1,80 | 1,19  |
| Gold whey chocolate                      | Weider                | 30 | 1 serving | 119,90 | 1,12  | 2,70 | 0,74  | 23,00 | 0,00  | 1,90 | 1,34  |
| Gold whey coco-cookie                    | Weider                | 30 | 1 serving | 122,90 | 1,43  | 3,00 | 1,06  | 23,00 | 0,00  | 2,10 | 1,64  |
| Gold whey fresa                          | Weider                | 30 | 1 serving | 117,30 | 0,85  | 2,50 | 0,53  | 23,00 | 0,00  | 1,70 | 1,04  |
| Gold whey mango-maracuya                 | Weider                | 30 | 1 serving | 116,50 | 0,77  | 2,30 | 0,32  | 23,00 | 0,00  | 1,70 | 1,04  |
| Gold whey stracciatella                  | Weider                | 30 | 1 serving | 122,90 | 1,43  | 3,00 | 1,06  | 23,00 | 0,00  | 2,10 | 1,64  |
| Gold whey vainilla                       | Weider                | 30 | 1 serving | 117,00 | 0,82  | 2,20 | 0,21  | 23,00 | 0,00  | 1,80 | 1,19  |
| Lean Protein vainilla                    | Weider                | 30 | 1 serving | 107,20 | -0,18 | 2,00 | 0,00  | 23,00 | 0,00  | 0,80 | -0,30 |
| Pro whey complex fresa                   | Victory endurance     | 30 | 2 serving | 113,30 | 0,44  | 3,30 | 1,38  | 23,00 | 0,00  | 0,90 | -0,15 |
| Pro whey complex vainilla                | Victory endurance     | 30 | 2 serving | 113,30 | 0,44  | 3,30 | 1,38  | 23,00 | 0,00  | 0,90 | -0,15 |
| Protein whey complex                     | Weider                | 30 | 1 serving | 116,50 | 0,77  | 3,20 | 1,28  | 23,00 | 0,00  | 1,30 | 0,45  |

|                                                         |                       |    |           |                                      |               |      |              |              |      |              |       |
|---------------------------------------------------------|-----------------------|----|-----------|--------------------------------------|---------------|------|--------------|--------------|------|--------------|-------|
| Vegan protein chocolate                                 | Weider                | 30 | 1 serving | 103,80                               | -0,53         | 1,60 | -0,43        | 23,00        | 0,00 | 0,60         | -0,60 |
| Super nitro whey fresa-banana                           | Victory endurance     | 30 | 1 serving | 121,70                               | 1,30          | 3,60 | 1,70         | 23,00        | 0,00 | 1,70         | 1,04  |
| Super nitro whey crema-vainilla                         | Victory endurance     | 30 | 1 serving | 120,90                               | 1,22          | 3,40 | 1,49         | 23,00        | 0,00 | 1,70         | 1,04  |
| Super nitro whey cookies&cream                          | Victory endurance     | 30 | 1 serving | 121,00                               | 1,23          | 3,20 | 1,28         | 23,00        | 0,00 | 1,80         | 1,19  |
| Premium whey chocolate-turrón                           | Weider                | 30 | 1 serving | 116,00                               | 0,72          | 2,40 | 0,43         | 23,00        | 0,00 | 1,60         | 0,90  |
| Iso whey protei capuchino                               | Keepgoing             | 30 | 2 serving | 115,90                               | 0,71          | 1,70 | -0,32        | 23,00        | 0,00 | 1,90         | 1,34  |
| Iso whey protei vainilla                                | Keepgoing             | 30 | 2 serving | 97,60                                | -1,17         | 1,40 | -0,64        | 23,00        | 0,00 |              | -1,49 |
| Proteina Bebida Whey Isolate 100 Banana-Strawberry 450g | Nutrixion             | 30 | 2 serving | 107,14                               | -0,19         | 2,34 | 0,36         | 23,76        | 0,65 | 0,31         | -1,03 |
| 100% all beef                                           | Crown sport nutrition | 30 | 3 seving  | 117,60                               | 0,88          | 0,90 | -1,17        | 23,55        | 0,47 | 2,20         | 1,79  |
| Proteína de suero hidrolizada                           | Myprotein             | 30 | 1 serving | 112,53                               | 0,36          | 0,96 | -1,11        | 24,00        | 0,86 | 1,41         | 0,61  |
| Gold whey frambuesa-yogur                               | Weider                | 30 | 1 serving | 121,70                               | 1,30          | 2,60 | 0,64         | 24,00        | 0,86 | 1,70         | 1,04  |
| Pro whey complex chocolate                              | Victory endurance     | 30 | 2 serving | 110,46                               | 0,15          | 1,68 | -0,34        | 24,00        | 0,86 | 0,86         | -0,21 |
| Protein 80 plus chocolate                               | Weider                | 30 | 2 serving | 108,90                               | -0,01         | 2,10 | 0,11         | 24,00        | 0,86 | 0,50         | -0,75 |
| Protein 80 plus fresa                                   | Weider                | 30 | 2 serving | 108,90                               | -0,01         | 2,10 | 0,11         | 24,00        | 0,86 | 0,50         | -0,75 |
| Protein 80 plus vainilla                                | Weider                | 30 | 2 serving | 109,70                               | 0,07          | 2,30 | 0,32         | 24,00        | 0,86 | 0,50         | -0,75 |
| Vegan protein vainilla                                  | Weider                | 30 | 1 serving | 105,60                               | -0,35         | 1,50 | -0,53        | 24,00        | 0,86 | 0,40         | -0,90 |
| Premium whey fresa-vainilla                             | Weider                | 30 | 1 serving | 115,70                               | 0,69          | 2,00 | 0,00         | 24,00        | 0,86 | 1,30         | 0,45  |
| Premium whey vainilla-caramelo                          | Weider                | 30 | 1 serving | 118,40                               | 0,97          | 2,00 | 0,00         | 24,00        | 0,86 | 1,60         | 0,90  |
| High protein shake vainilla                             | Etixx                 | 30 | 1 serving | 106,00                               | -0,31         | 1,30 | -0,74        | 24,30        | 1,12 | 0,40         | -0,90 |
|                                                         |                       |    |           | <b>Media</b>                         | <b>108,72</b> |      | <b>2,10</b>  | <b>22,64</b> |      | <b>1,11</b>  |       |
|                                                         |                       |    |           | <b>Deviation</b>                     | <b>9,74</b>   |      | <b>0,94</b>  | <b>1,16</b>  |      | <b>0,67</b>  |       |
|                                                         |                       |    |           | <b>Coefficient of Variation (CV)</b> | <b>8,95</b>   |      | <b>45,03</b> | <b>5,11</b>  |      | <b>60,34</b> |       |

| <b>PROTEIN POWDERS GROUP</b><br>Subgroup 2. Between ≥25 and 30 g protein | <b>EXCHANGE VALUE</b> |                             |                       | <b>119</b>           | <b>0,28</b>    | <b>2,00</b>             | <b>0,36</b>    | <b>26,00</b>       | <b>0,18</b>    | <b>0,5</b>     | <b>-0,26</b>   |
|--------------------------------------------------------------------------|-----------------------|-----------------------------|-----------------------|----------------------|----------------|-------------------------|----------------|--------------------|----------------|----------------|----------------|
| <b>Product name</b>                                                      | <b>Brand name</b>     | <b>Net weight (g or ml)</b> | <b>Serving dosage</b> | <b>Energy (Kcal)</b> | <b>Z value</b> | <b>Carbohydrate (g)</b> | <b>Z value</b> | <b>Protein (g)</b> | <b>Z value</b> | <b>Fat (g)</b> | <b>Z value</b> |
| Iso pro-t sabor chocolate                                                | Infisport             | 30                          | 3 serving             | 111,45               | -0,59          | 2,30                    | 0,29           | 25,00              | -1,00          | 0,25           | -0,33          |
| Iso pro-t sabor fresa                                                    | Infisport             | 30                          | 3 serving             | 105,20               | -1,08          | 1,30                    | -0,67          | 25,00              | -1,00          | 0,00           | -0,66          |
| Iso whey leucina+ sabor chocolate                                        | Infisport             | 34                          | 3 serving             | 129,60               | 0,83           | 2,00                    | 0,00           | 25,00              | -1,00          | 2,40           | 2,50           |
| Iso whey leucina+ sabor fresa                                            | Infisport             | 33                          | 3 serving             | 109,20               | -0,76          | 2,30                    | 0,29           | 25,00              | -1,00          | 0,00           | -0,66          |
| Iso whey leucina+ sabor mango                                            | Infisport             | 33                          | 3 serving             | 124,40               | 0,42           | 1,60                    | -0,38          | 25,00              | -1,00          | 2,00           | 1,97           |
| Isolate whey 100 cfm sabor chocolate fondant                             | Weider                | 30                          | 1 serving             | 110,80               | -0,64          | 0,90                    | -1,05          | 25,00              | -1,00          | 0,80           | 0,39           |
| Isolate whey 100 cfm sabor strawberry ice cream                          | Weider                | 30                          | 1 serving             | 109,70               | -0,73          | 1,30                    | -0,67          | 25,00              | -1,00          | 0,50           | 0,00           |
| Protein 80 plus frutos del bosque                                        | Weider                | 30                          | 2 serving             | 112,90               | -0,48          | 2,10                    | 0,10           | 25,00              | -1,00          | 0,50           | 0,00           |
| Protein 80 plus plátano                                                  | Weider                | 30                          | 2 serving             | 113,70               | -0,41          | 2,30                    | 0,29           | 25,00              | -1,00          | 0,50           | 0,00           |
| Protein drink whey isolate 100 450g raspberry-blackberry                 | Nutrixion             | 30                          | 2 serving             | 108,42               | -0,83          | 1,32                    | -0,65          | 25,12              | -0,88          | 0,30           | -0,27          |
| Isolate whey 100 cfm sabor vanilla cream                                 | Weider                | 30                          | 1 serving             | 110,30               | -0,68          | 0,90                    | -1,05          | 26,00              | 0,00           | 0,30           | -0,26          |
| Isolate whey 100 cfm sabor cookies & cream                               | Weider                | 30                          | 1 serving             | 114,10               | -0,38          | 1,40                    | -0,57          | 26,00              | 0,00           | 0,50           | 0,00           |
| Neo isolate whey chocolate                                               | Victory endurance     | 30                          | 1 serving             | 111,60               | -0,58          | 1,00                    | -0,95          | 26,00              | 0,00           | 0,40           | -0,13          |
| Neo isolate whey vainilla                                                | Victory endurance     | 30                          | 1 serving             | 110,70               | -0,65          | 1,00                    | -0,95          | 26,00              | 0,00           | 0,30           | -0,26          |
| Proteina bebida whey isolate 100 schoko-nocciola 450g                    | Nutrixion             | 30                          | 2 serving             | 111,94               | -0,55          | 1,02                    | -0,93          | 26,14              | 0,14           | 0,36           | -0,18          |
| Soy protein isolate                                                      | Myprotein             | 30                          | 1,25 serving          | 114,90               | -0,32          | 0,30                    | -1,62          | 26,40              | 0,40           | 0,90           | 0,53           |
| Proteina bebida whey isolate 100 vanilla 450g                            | Nutrixion             | 30                          | 2 serving             | 111,65               | -0,57          | 0,58                    | -1,36          | 26,72              | 0,72           | 0,27           | -0,30          |
| Neo isolate whey fresa                                                   | Victory endurance     | 30                          | 1 serving             | 114,70               | -0,34          | 1,00                    | -0,95          | 27,00              | 1,00           | 0,30           | -0,26          |
| Protein secuencial sabor chocolate                                       | Infisport             | 40                          | 3 serving             | 146,30               | 2,13           | 2,50                    | 0,48           | 28,00              | 2,00           | 2,70           | 2,89           |

|                            |        |    |           |                                      |               |      |              |       |              |      |               |
|----------------------------|--------|----|-----------|--------------------------------------|---------------|------|--------------|-------|--------------|------|---------------|
| K-weeks immune - chocolate | 226ers | 40 | 2 serving | 138,56                               | 1,53          | 5,20 | 3,05         | 28,00 | 2,00         | 0,64 | 0,18          |
|                            |        |    |           | <b>Media</b>                         | <b>116,01</b> |      | <b>1,62</b>  |       | <b>25,82</b> |      | <b>0,70</b>   |
|                            |        |    |           | <b>Deviation</b>                     | <b>10,58</b>  |      | <b>1,05</b>  |       | <b>1,00</b>  |      | <b>0,76</b>   |
|                            |        |    |           | <b>Coefficient of Variation (CV)</b> | <b>9,12</b>   |      | <b>65,19</b> |       | <b>3,86</b>  |      | <b>109,29</b> |

| PROTEIN BARS GROUP                                          |                   | EXCHANGE VALUE       |                |               |         |                  |         |             |         |         |         |
|-------------------------------------------------------------|-------------------|----------------------|----------------|---------------|---------|------------------|---------|-------------|---------|---------|---------|
| Subgroup 1. <15 g protein per serving.                      |                   |                      |                |               |         |                  |         |             |         |         |         |
| Product name                                                | Brand name        | Net weight (g or ml) | Serving dosage | Energy (Kcal) | Z value | Carbohydrate (g) | Z value | Protein (g) | Z value | Fat (g) | Z value |
| Vegan protein bar frutos rojos                              | Victory endurance | 35                   | 1 serving      | 136,20        | -0,97   | 16,00            | -0,46   | 7,70        | -2,10   | 4,60    | -0,23   |
| Vegan protein bar cacahuete salado                          | Victory endurance | 35                   | 1 serving      | 154,90        | -0,24   | 13,00            | -1,14   | 8,40        | -1,66   | 7,70    | 1,53    |
| Barritas proteicas avellana                                 | Weider            | 35                   | 1 serving      | 146,90        | -0,55   | 16,00            | -0,46   | 8,80        | -1,40   | 5,30    | 0,17    |
| Barritas proteicas chocolate blanco                         | Weider            | 35                   | 1 serving      | 142,00        | -0,74   | 17,00            | -0,23   | 9,50        | -0,96   | 4,00    | -0,57   |
| Chocolate blanco                                            | Weider            | 35                   | 1 serving      | 142,00        | -0,74   | 17,00            | -0,23   | 9,50        | -0,96   | 4,00    | -0,57   |
| Classic bar banana                                          | Weider            | 35                   | 1 serving      | 142,90        | -0,71   | 17,00            | -0,23   | 9,50        | -0,96   | 4,10    | -0,51   |
| Cacao y reishi                                              | Paleobull         | 50                   | 1 serving      | 201,04        | 1,56    | 22,71            | 1,08    | 10,01       | -0,63   | 7,80    | 1,59    |
| Protein bar sabor fresa-chocolate                           | Infisport         | 40                   | 1 serving      | 156,32        | -0,18   | 17,92            | -0,02   | 10,72       | -0,18   | 4,64    | -0,20   |
| Nutrixxion proteina (bajo en azúcar) barrita cheesecake 35g | Nutrixxion        | 35                   | 1 serving      | 124,15        | -1,44   | 10,75            | -1,66   | 10,92       | -0,05   | 4,17    | -0,47   |
| Nutrixxion proteina (bajo en azúcar) barrita choco caramel  | Nutrixxion        | 35                   | 1 serving      | 122,40        | -1,51   | 10,68            | -1,67   | 11,03       | 0,02    | 3,96    | -0,59   |
| Nutrixxion proteina (bajo en azúcar) barrita toffee         | Nutrixxion        | 35                   | 1 serving      | 122,40        | -1,51   | 10,68            | -1,67   | 11,03       | 0,02    | 3,96    | -0,59   |
| Vegan protein bar - cacao                                   | 226ers            | 40                   | 1 serving      | 148,16        | -0,50   | 16,28            | -0,39   | 11,04       | 0,03    | 4,32    | -0,39   |
| Protein "low sugar" riegel 35g coconut                      | Nutrixxion        | 35                   | 1 serving      | 123,52        | -1,46   | 10,61            | -1,69   | 11,06       | 0,04    | 4,10    | -0,51   |
| Barritas con proteínas – yogur y vainilla                   | Enervit           | 40                   | 1 serving      | 152,36        | -0,34   | 19,60            | 0,37    | 11,20       | 0,13    | 3,24    | -1,00   |
| Protein bar sabor chocolate-chocolate                       | Infisport         | 40                   | 1 serving      | 174,64        | 0,53    | 18,40            | 0,09    | 11,40       | 0,25    | 6,16    | 0,66    |

|                                                          |           |    |           |                                      |       |               |       |              |       |              |              |
|----------------------------------------------------------|-----------|----|-----------|--------------------------------------|-------|---------------|-------|--------------|-------|--------------|--------------|
| Vegan protein bar - frambuesa                            | 226ers    | 40 | 1 serving | 148,00                               | -0,51 | 19,04         | 0,24  | 11,48        | 0,31  | 2,88         | -1,20        |
| Recovery bar mani                                        | Etixx     | 40 | 1 serving | 160,00                               | -0,04 | 19,00         | 0,23  | 12,00        | 0,64  | 4,00         | -0,57        |
| Protein rocky road bar                                   | Myprotein | 50 | 1 serving | 230,00                               | 2,70  | 23,00         | 1,14  | 12,00        | 0,64  | 10,00        | 2,84         |
| Enervit power sport barrita proteina – chocolate y crema | Enervit   | 45 | 1 serving | 178,97                               | 0,70  | 18,41         | 0,09  | 12,06        | 0,68  | 6,35         | 0,76         |
| Naranja y chía                                           | Paleobull | 50 | 1 serving | 184,94                               | 0,94  | 21,88         | 0,88  | 12,39        | 0,89  | 5,32         | 0,18         |
| Vegan carb crusher                                       | Myprotein | 50 | 1 serving | 169,00                               | 0,31  | 14,00         | -0,91 | 12,50        | 0,96  | 7,00         | 1,14         |
| Recovery plus choco & coconut                            | Keepgoing | 40 | 1 serving | 177,00                               | 0,63  | 22,40         | 1,00  | 12,40        | 0,89  | 4,20         | -0,45        |
| Recovery bar caramelo                                    | Etixx     | 40 | 1 serving | 165,00                               | 0,16  | 17,00         | -0,23 | 13,00        | 1,27  | 5,00         | 0,00         |
| Flapjack ligera                                          | Myprotein | 50 | 1 serving | 152,85                               | -0,32 | 24,50         | 1,48  | 10,00        | -0,64 | 1,65         | -1,90        |
| Melocotón                                                | Paleobull | 50 | 1 serving | 184,63                               | 0,92  | 24,01         | 1,37  | 12,55        | 0,99  | 4,27         | -0,42        |
| Enervit power sport – crunchy cookie                     | Enervit   | 40 | 1 serving | 150,88                               | -0,40 | 24,00         | 1,37  | 7,60         | -2,17 | 2,72         | -1,30        |
| Café y guaraná                                           | Paleobull | 50 | 1 serving | 186,12                               | 0,98  | 23,18         | 1,18  | 13,45        | 1,56  | 4,40         | -0,34        |
|                                                          |           |    |           | <b>Media</b>                         |       | <b>158,42</b> |       | <b>17,93</b> |       | <b>10,86</b> | <b>4,81</b>  |
|                                                          |           |    |           | <b>Deviation</b>                     |       | <b>25,60</b>  |       | <b>4,38</b>  |       | <b>1,57</b>  | <b>1,76</b>  |
|                                                          |           |    |           | <b>Coefficient of Variation (CV)</b> |       | <b>16,16</b>  |       | <b>24,42</b> |       | <b>14,50</b> | <b>36,55</b> |

| <b>PROTEIN BARS GROUP</b>                        |                   |                             |                       |                      |                |                         |                |                    |                |                |                |              |
|--------------------------------------------------|-------------------|-----------------------------|-----------------------|----------------------|----------------|-------------------------|----------------|--------------------|----------------|----------------|----------------|--------------|
| <u>Subgroup 2. &gt;20 g protein per serving.</u> |                   | <b>EXCHANGE VALUE</b>       |                       |                      | <b>192,00</b>  | <b>0,00</b>             | <b>14,00</b>   | <b>0,10</b>        | <b>23,00</b>   | <b>0,10</b>    | <b>5,00</b>    | <b>-0,15</b> |
| <b>Product name</b>                              | <b>Brand name</b> | <b>Net weight (g or ml)</b> | <b>Serving dosage</b> | <b>Energy (Kcal)</b> | <b>Z value</b> | <b>Carbohydrate (g)</b> | <b>Z value</b> | <b>Protein (g)</b> | <b>Z value</b> | <b>Fat (g)</b> | <b>Z value</b> |              |
| 40% low carb high protein bar cacahuete-caramelo | Weider            | 50                          | 1 serving             | 163,10               | -0,50          | 11,10                   | -0,75          | 20,00              | -0,97          | 4,30           | -0,57          |              |
| 40% low carb high protein bar stracciatela       | Weider            | 50                          | 1 serving             | 164,10               | -0,48          | 10,00                   | -1,03          | 20,00              | -0,97          | 4,90           | -0,08          |              |



|                                                  |           |    |           |                                      |               |       |              |       |              |      |              |
|--------------------------------------------------|-----------|----|-----------|--------------------------------------|---------------|-------|--------------|-------|--------------|------|--------------|
| 40% low carb high protein bar frutos rojos       | Weider    | 50 | 1 serving | 164,30                               | -0,48         | 11,40 | -0,67        | 20,00 | -0,97        | 4,30 | -0,57        |
| High protein bar coconut                         | Etixx     | 50 | 1 serving | 186,00                               | -0,10         | 13,00 | -0,26        | 20,00 | -0,97        | 6,00 | 0,81         |
| High protein bar vainilla                        | Etixx     | 50 | 1 serving | 186,00                               | -0,10         | 13,00 | -0,26        | 20,00 | -0,97        | 6,00 | 0,81         |
| The carb crusher (caramelo con nueces)           | Myprotein | 60 | 1 serving | 207,60                               | 0,27          | 12,00 | -0,52        | 21,00 | -0,65        | 8,40 | 2,76         |
| Neo bar - chocolate                              | 226ers    | 50 | 1 serving | 192,85                               | 0,01          | 12,35 | -0,43        | 24,95 | 0,63         | 4,85 | -0,12        |
| Neo bar - banana . Flavour y chocolate           | 226ers    | 50 | 1 serving | 193,90                               | 0,03          | 12,45 | -0,40        | 25,00 | 0,65         | 4,90 | -0,08        |
| Barrita de rendimiento todo-en-uno               | Myprotein | 70 | 1 serving | 260,47                               | 1,19          | 23,10 | 2,35         | 28,00 | 1,62         | 6,23 | 1,00         |
| Barrita proteica elite (caramelo y avellana)     | Myprotein | 70 | 1 serving | 256,20                               | 1,11          | 22,40 | 2,16         | 25,90 | 0,94         | 7,00 | 1,63         |
| 52% protein bar stracciatella                    | Weider    | 50 | 1 serving | 196,80                               | 0,08          | 14,20 | 0,05         | 26,00 | 0,97         | 4,00 | -0,81        |
| 52% protein bar cacahuete-caramelo               | Weider    | 50 | 1 serving | 203,60                               | 0,20          | 15,00 | 0,26         | 26,00 | 0,97         | 4,40 | -0,49        |
| 52% protein bar chocolate                        | Weider    | 50 | 1 serving | 201,80                               | 0,17          | 15,00 | 0,26         | 26,00 | 0,97         | 4,20 | -0,65        |
| 40% low carb high protein bar cacahuete-caramelo | Weider    | 50 | 1 serving | 163,10                               | -0,50         | 11,10 | -0,75        | 20,00 | -0,97        | 4,30 | -0,57        |
| 40% low carb high protein bar stracciatela       | Weider    | 50 | 1 serving | 164,10                               | -0,48         | 10,00 | -1,03        | 20,00 | -0,97        | 4,90 | -0,08        |
| 40% low carb high protein bar frutos rojos       | Weider    | 50 | 1 serving | 164,30                               | -0,48         | 11,40 | -0,67        | 20,00 | -0,97        | 4,30 | -0,57        |
|                                                  |           |    |           | <b>Media</b>                         | <b>191,76</b> |       | <b>13,59</b> |       | <b>22,68</b> |      | <b>5,19</b>  |
|                                                  |           |    |           | <b>Deviation</b>                     | <b>57,69</b>  |       | <b>3,88</b>  |       | <b>3,08</b>  |      | <b>1,23</b>  |
|                                                  |           |    |           | <b>Coefficient of Variation (CV)</b> | <b>0,00</b>   |       | <b>28,57</b> |       | <b>13,59</b> |      | <b>23,63</b> |

|                           |                       |            |             |           |              |           |             |          |              |
|---------------------------|-----------------------|------------|-------------|-----------|--------------|-----------|-------------|----------|--------------|
| <b>LIQUID MEALS GROUP</b> | <b>EXCHANGE VALUE</b> | <b>176</b> | <b>0,00</b> | <b>18</b> | <b>-0,19</b> | <b>21</b> | <b>0,26</b> | <b>2</b> | <b>-0,42</b> |
|---------------------------|-----------------------|------------|-------------|-----------|--------------|-----------|-------------|----------|--------------|

| <u>Subgroup 1. Ratio of 1 Carbohydrate/1 protein.</u> |            |                      |                |               |         |                  |         |              |         |              |         |
|-------------------------------------------------------|------------|----------------------|----------------|---------------|---------|------------------|---------|--------------|---------|--------------|---------|
| Product name                                          | Brand name | Net weight (g or ml) | Serving dosage | Energy (Kcal) | Z value | Carbohydrate (g) | Z value | Protein (g)  | Z value | Fat (g)      | Z value |
| Top 50/50 recovery 1:1 leucina+ sabor chocolate       | Infisport  | 40                   | 2 serving      | 145,38        | -2,11   | 15,76            | -1,52   | 17,84        | -2,43   | 1,22         | -1,32   |
| Recovery drink - fresa                                | 226ers     | 50                   | 4 serving      | 184,50        | 0,59    | 19,50            | 1,02    | 21,00        | 0,00    | 2,50         | 0,85    |
| Recovery drink - choco                                | 226ers     | 50                   | 4 serving      | 179,20        | 0,22    | 18,00            | 0,00    | 20,50        | -0,38   | 2,80         | 1,36    |
| Recovery drink- sandía                                | 226ers     | 50                   | 4 serving      | 184,50        | 0,59    | 19,00            | 0,68    | 21,50        | 0,38    | 2,50         | 0,85    |
| Recovery drink - vainilla                             | 226ers     | 50                   | 4 serving      | 185,40        | 0,65    | 18,50            | 0,34    | 22,00        | 0,77    | 2,60         | 1,02    |
| Recovery drink yogur de limon                         | 226ers     | 50                   | 4 serving      | 181,60        | 0,39    | 20,00            | 1,36    | 20,00        | -0,77   | 2,40         | 0,68    |
| Recovery drink - vanilla y cafe                       | 226ers     | 50                   | 4 serving      | 184,95        | 0,62    | 19,00            | 0,68    | 21,50        | 0,38    | 2,55         | 0,93    |
| Full training complex shake soy- chocolate            | Etixx      | 50                   | 4 serving      | 162,60        | -0,92   | 16,50            | -1,02   | 21,00        | 0,00    | 1,40         | -1,02   |
| <b>Media</b>                                          |            |                      |                | <b>176,02</b> |         | <b>18,28</b>     |         | <b>20,67</b> |         | <b>2,25</b>  |         |
| <b>Deviation</b>                                      |            |                      |                | <b>14,50</b>  |         | <b>1,47</b>      |         | <b>1,30</b>  |         | <b>0,59</b>  |         |
| <b>Coefficient of Variation (CV)</b>                  |            |                      |                | <b>8,24</b>   |         | <b>8,04</b>      |         | <b>6,30</b>  |         | <b>26,31</b> |         |

| <b>LIQUID MEALS GROUP</b>                               |                       |                      |                |               |             |                  |              |             |             |            |             |
|---------------------------------------------------------|-----------------------|----------------------|----------------|---------------|-------------|------------------|--------------|-------------|-------------|------------|-------------|
| <u>Subgroup 2. Ratio of 2-4 Carbohydrate/1 protein.</u> |                       |                      |                |               |             |                  |              |             |             |            |             |
| <b>EXCHANGE VALUE</b>                                   |                       |                      |                | <b>154,5</b>  | <b>0,00</b> | <b>28,00</b>     | <b>-0,03</b> | <b>10</b>   | <b>0,15</b> | <b>0,5</b> | <b>0,38</b> |
| Product name                                            | Brand name            | Net weight (g or ml) | Serving dosage | Energy (Kcal) | Z value     | Carbohydrate (g) | Z value      | Protein (g) | Z value     | Fat (g)    | Z value     |
| 3:1 pro recovery                                        | Crown sport nutrition | 59                   | 1 serving      | 148,10        | -0,35       | 25,30            | -0,70        | 10,60       | 0,34        | 0,50       | 0,00        |
| Roubaix                                                 | Geo                   | 40                   | 3 serving      | 128,00        | -1,46       | 22,00            | -1,56        | 10,00       | 0,00        | 0,00       | -1,28       |
| Complex 4:1 recovery sabor fresa                        | Infisport             | 40                   | 3 serving      | 151,85        | -0,15       | 30,00            | 0,52         | 7,40        | -1,49       | 0,25       | -0,64       |
| Complex 4:1 recovery sabor chocolate                    | Infisport             | 40                   | 3 serving      | 145,70        | -0,49       | 27,00            | -0,26        | 7,40        | -1,49       | 0,90       | 1,03        |

|                                          |               |    |           |                                      |               |       |              |       |              |      |               |
|------------------------------------------|---------------|----|-----------|--------------------------------------|---------------|-------|--------------|-------|--------------|------|---------------|
| Complex 4:1 recovery salts               | Infisport     | 40 | 3 serving | 143,45                               | -0,61         | 28,00 | 0,00         | 7,30  | -1,55        | 0,25 | -0,64         |
| Recovery 3:1                             | Recuperat-ion | 50 | 2 serving | 181,60                               | 1,50          | 33,60 | 1,45         | 11,80 | 1,03         | 0,00 | -1,28         |
| Recuperador vegano                       | Myprotein     | 52 | 1 serving | 183,04                               | 1,58          | 31,20 | 0,83         | 14,56 | 2,62         | 0,00 | -1,28         |
| Enervit r1 sport                         | Enervit       | 45 | 3 serving | 148,96                               | -0,31         | 28,17 | 0,04         | 9,07  | -0,53        | 0,00 | -1,28         |
| Premium amino intra workout fresh orange | Weider        | 40 | 2 serving | 137,20                               | -0,96         | 24,00 | -1,04        | 10,30 | 0,17         | 0,00 | -1,28         |
| Premium amino intra workout tropical     | Weider        | 40 | 2 serving | 137,20                               | -0,96         | 24,00 | -1,04        | 10,30 | 0,17         | 0,00 | -1,28         |
| Mass gainer chocolate                    | Weider        | 50 | 1 serving | 177,45                               | 1,27          | 32,00 | 1,04         | 10,00 | 0,00         | 1,05 | 1,41          |
| Mass gainer fresa                        | Weider        | 50 | 1 serving | 177,45                               | 1,27          | 32,00 | 1,04         | 10,00 | 0,00         | 1,05 | 1,41          |
| Recovery shake chocolate                 | Etixx         | 50 | 3 serving | 182,41                               | 1,54          | 35,90 | 2,05         | 8,60  | -0,80        | 0,49 | -0,03         |
| Quick recovery sandia                    | Keepgoing     | 40 | 2 serving | 147,19                               | -0,40         | 27,07 | -0,24        | 9,30  | -0,40        | 0,19 | -0,79         |
| Quick recovery chocolate                 | Keepgoing     | 40 | 2 serving | 143,38                               | -0,61         | 23,68 | -1,12        | 10,14 | 0,08         | 0,90 | 1,03          |
| Quick recovery vainilla-canela           | Keepgoing     | 40 | 2 serving | 147,44                               | -0,39         | 27,01 | -0,26        | 9,40  | -0,34        | 0,20 | -0,77         |
| Quick recovery piña                      | Keepgoing     | 40 | 2 serving | 147,47                               | -0,39         | 27,00 | -0,26        | 9,44  | -0,32        | 0,19 | -0,79         |
|                                          |               |    |           | <b>Media</b>                         | <b>154,58</b> |       | <b>28,11</b> |       | <b>9,74</b>  |      | <b>0,35</b>   |
|                                          |               |    |           | <b>Deviation</b>                     | <b>18,09</b>  |       | <b>3,85</b>  |       | <b>1,74</b>  |      | <b>0,39</b>   |
|                                          |               |    |           | <b>Coefficient of Variation (CV)</b> | <b>11,70</b>  |       | <b>13,71</b> |       | <b>17,83</b> |      | <b>111,56</b> |
